# Supplementary material for: Pharmacological Inhibition of NOS Activates ASK1/JNK Pathway Augmenting Docetaxel-Mediated Apoptosis in Triple-Negative Breast Cancer
Source: Oxford University Press journal article supplement (doi:10.1158/1078-0432.ccr-17-1437), 2018-01-04
Supplement: 10780432ccr171437-sup-183541_3_supp_4458675_p16mcn.docx [file 10780432ccr171437-sup-183541_3_supp_4458675_p16mcn.docx]

**Supplemental figures**


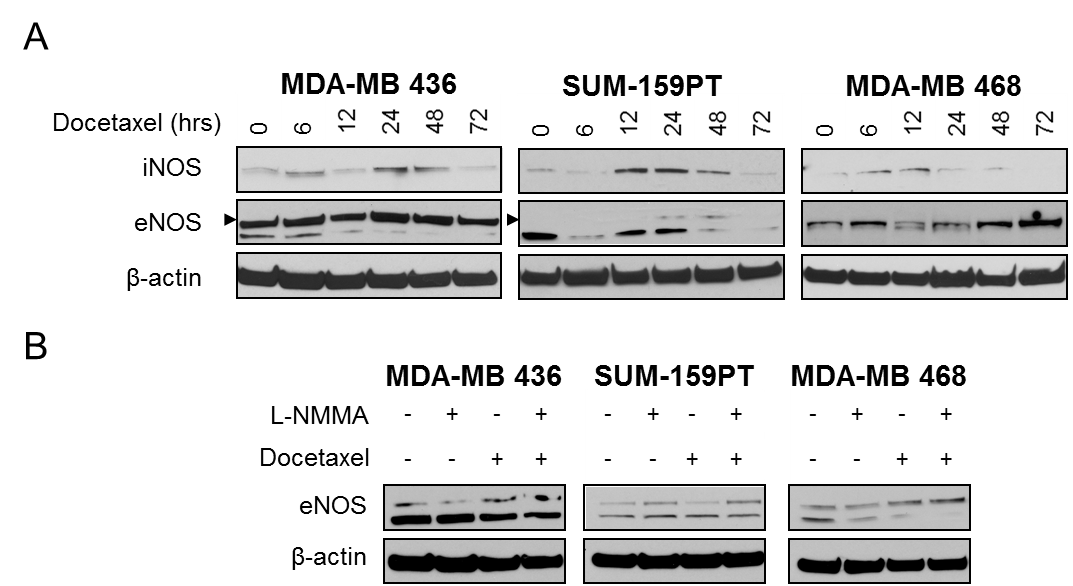


**Supplemental Figure 1. Docetaxel induce the expression of iNOS following a bell shape distribution, no consistent effect is observed on eNOS.** (**A**)MDA-MB 436, SUM-159 and MDA-MB 468 cells were treated with Docetaxel (5 nM on day 1) for 6, 12, 24, 48 and 72 hours, for “0 hours” cells were treated with vehicle (DMSO) and collected after 24. iNOS and eNOS expression were assessed by western blot. (**B**) MDA-MB 436, SUM-159 and MDA-MB 468 cells were treated with Docetaxel (5 nM on day 1) or/and L-NMMA (4mM daily) for 48 hours, eNOS expression was evaluated by western blot, no significant changes were observed between docetaxel and its combination with L-NMMA.


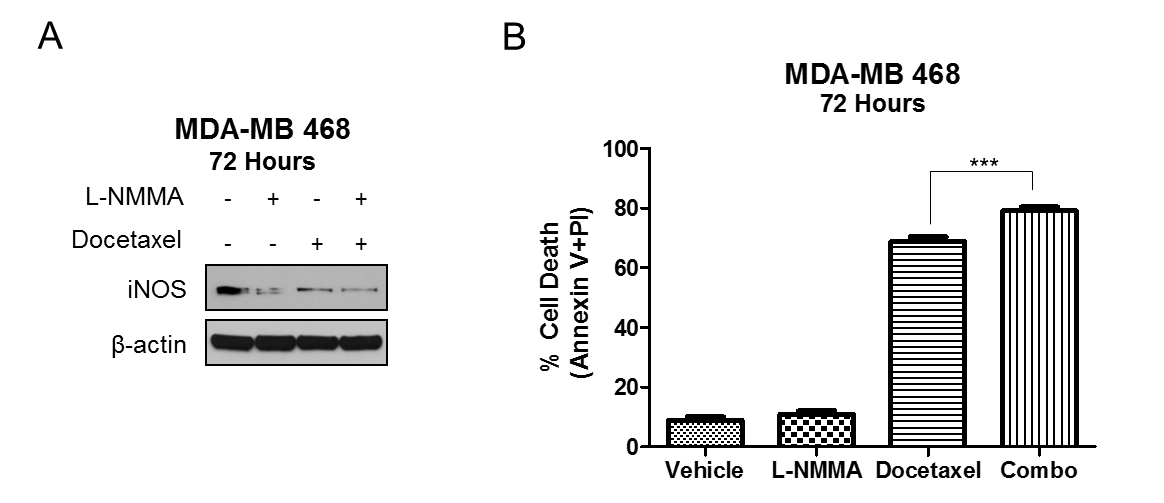


**Supplemental Figure 2. L-NMMA decreased iNOS and enhances docetaxel toxicity on MDA-MB 468**. (**A**) MDA-MB 468 cells were treated with L-NMMA (4 mM daily) and/or DTX (5 nM on day 1) for 72 hours, iNOS expression was assessed by western blot. (**B**)MDA-MB 468 were treated with L-NMMA (4 mM daily) and/or DTX (5 nM on day 1) for 72 hours, cells death was evaluated by flow cytometry using Annexin V and PI stainings. (****p<*0.001).

**Supplemental Figure 3. Response to NOS inhibition therapy on TNBC PDXs. (A-B)** Mice growing orthotopic tumors BCM-2147 (n=7 per arm) were randomized and treated (3 cycles each on of 14 days) with vehicle, L-NMMA 400 mg/kg oral gavage on day 2 and 9, 200mg/kg on days3-6 and 10-13, amlodipine (10 mg/kg intraperitoneal injection on days 2-6 and 9-13), the combination of L-NMMA and amlodipine, docetaxel (20 mg/kg intraperitoneal on day 1), docetaxel and amlodipine, docetaxel and L-NMMA, and the combination of the three agents. Tumor volumes were measured twice weekly. Average tumor volumes (0.5 × (long dimension) × (short dimension)2 ). Data are mean tumor volume ± SEM**.** For a clear comparison, groups receiving docetaxel were plot in a different graph, vehicle curve is repeated in both graphs. (**p <* 0.05) **(C-F)** PDX BCM-5998, PDX BCM-3107, PDX BCM-4664, and PDX BCM-2147 was treated with vehicle, docetaxel or combination therapy, weight was recorded two times a week, details about treatment can be found on the legend of Figure 2, no weight lost was observed due combination therapy (Docetaxel + NOS inhibition).


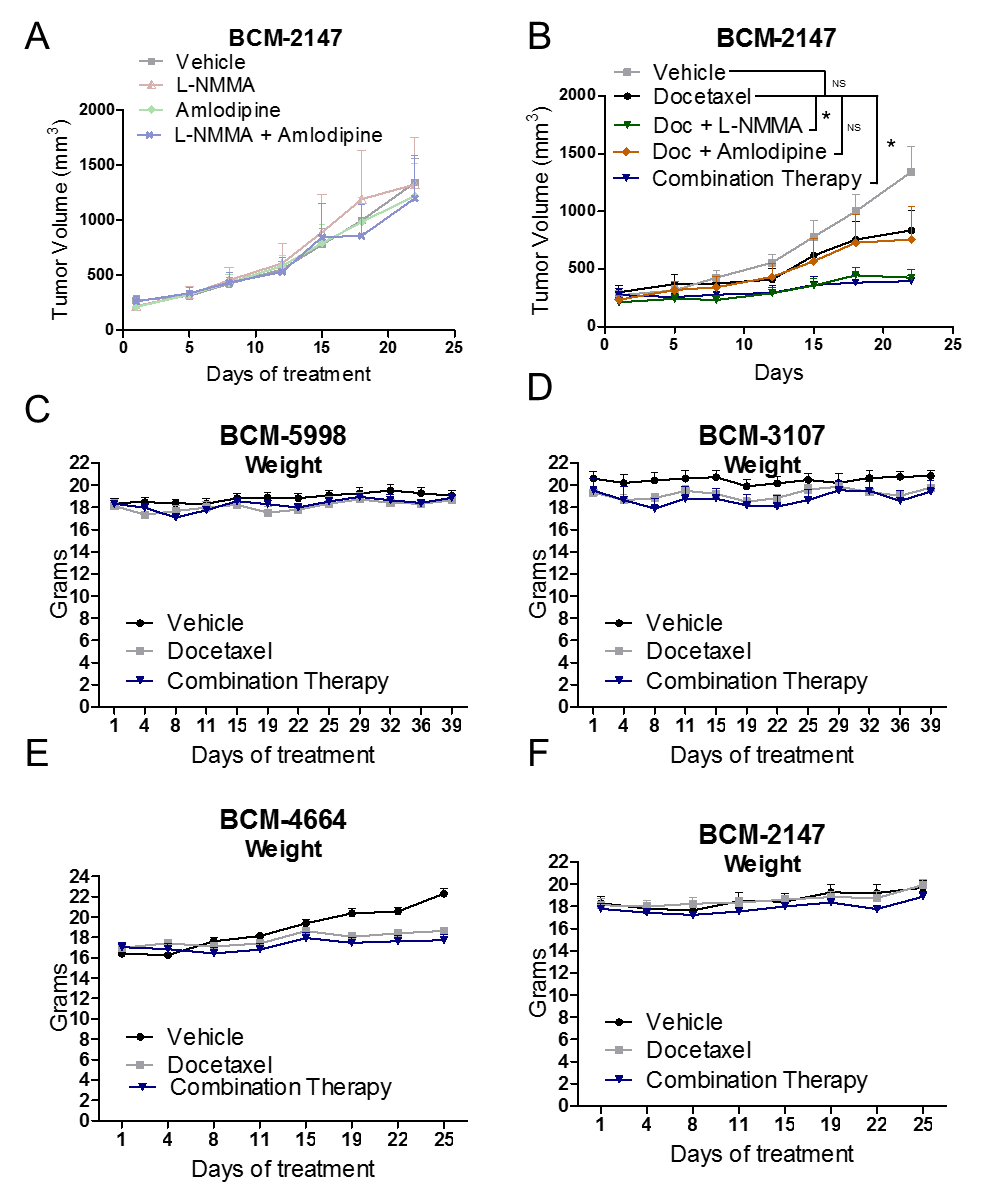


`


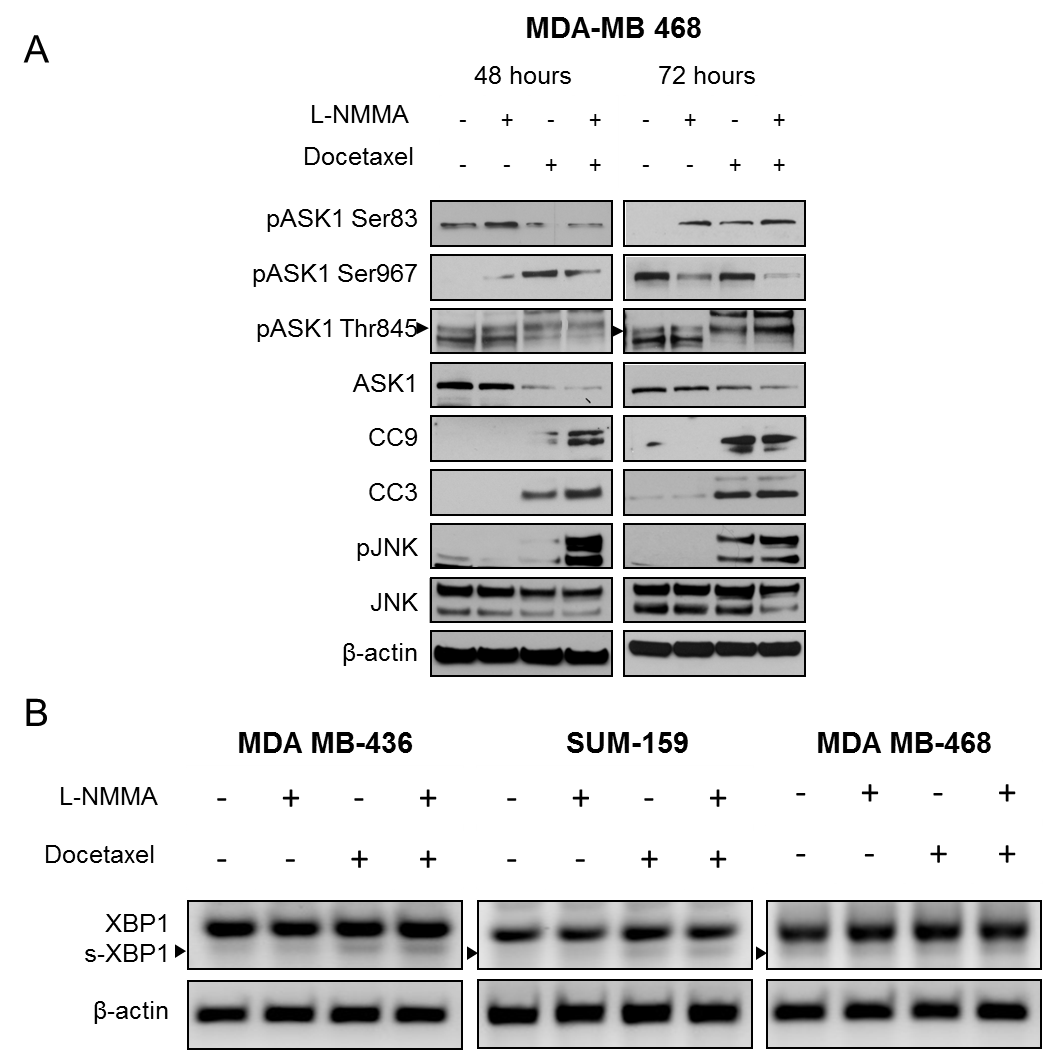


**Supplemental Figure 4**. **(A) NOS inhibition mitigates pro-survival pathways activated by docetaxel.** MDA-MB 468 were treated with L-NMMA (4mM) and/or DTX (5nM) for 48 and 72 hours, cells were collected and protein extracted; apoptosis (pASK1 Ser967, pASK1 Thr845, ASK1, CC9, CC3, pJNK, JNK) markers were evaluated with western blot. β-actin served as a loading control. (B) **Docetaxel and Combination therapy induce XBP1 alternative splicing**, MDA-MB 436, SUM-159PT and MDA-MB 468 were treated with L-NMMA (4mM) and/or DOCETAXEL (5nM) for 48 hours, RNA were collected and rtPCR from its cDNA was used t evaluate the presence of s-XBP1 in an agarose well.


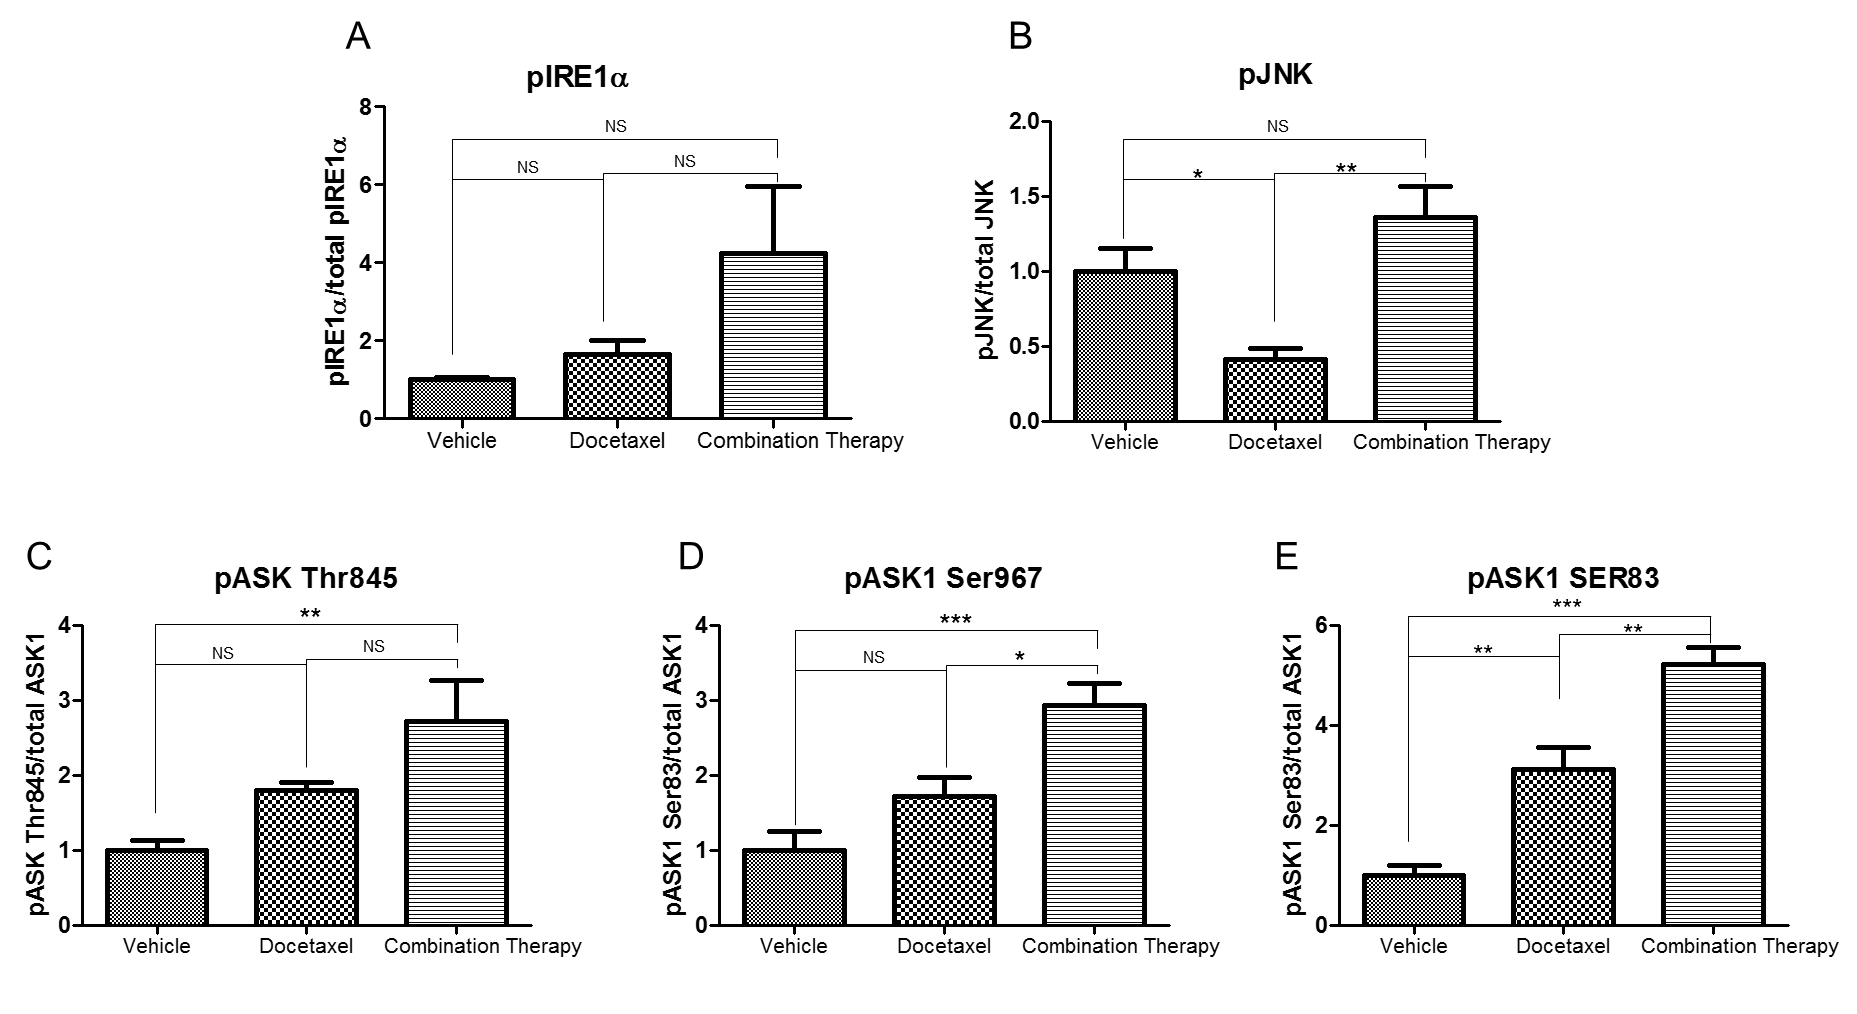


**Supplemental Figure 5. NOS inhibition therapy enhance apoptotic response.** Mice growing orthotopic tumors BCM-5998 (n=5) were randomized and treated with vehicle, docetaxel, or combination therapy (Docetaxel + NOS inhibition Therapy), after 40 days of treatment tumors were collected and processed, target engagement, EnR stress and apoptosis markers were evaluated by western blot (Figure 4). (**A-E**) Densitometrical analysis was made to quantify and compare phosphorylation levels of pIRE1α, JNK, and ASK1 proteins. (**p <* 0.05, ***p<*0.01, ****p<*0.001).

**Supplemental Figure 5. NOS inhibition therapy enhance apoptotic response.** (**F-G**) Mice growing orthotopic tumors BCM-5998 (n=5) were randomized and treated with vehicle, docetaxel, or combination therapy (Docetaxel + NOS inhibition Therapy), after 40 days of treatment tumors, tumor tissue were processed and embedded in paraffin, slides were stained with Ki67antibody and with Click-iT™ Plus TUNEL. Representative fields of each slide are presented. Amplification: 20x; counterstain: hematoxylin and DAPI.


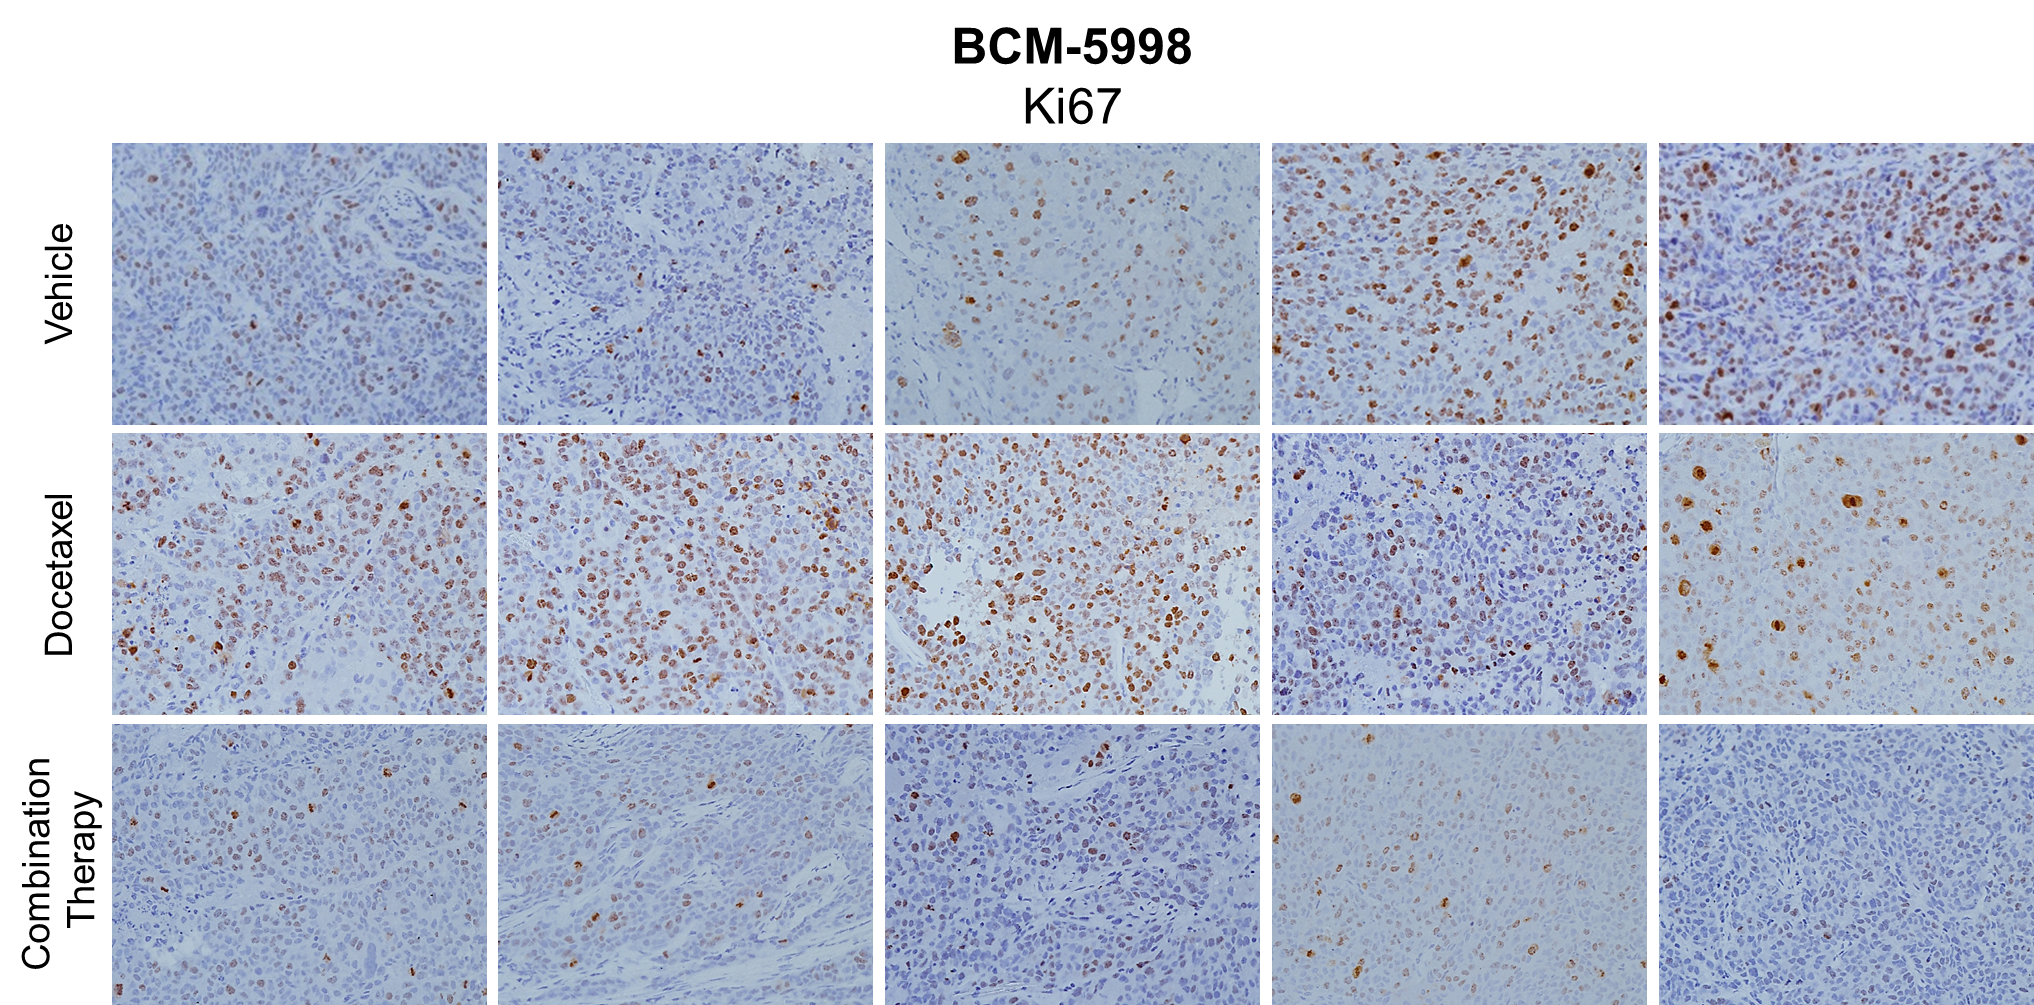

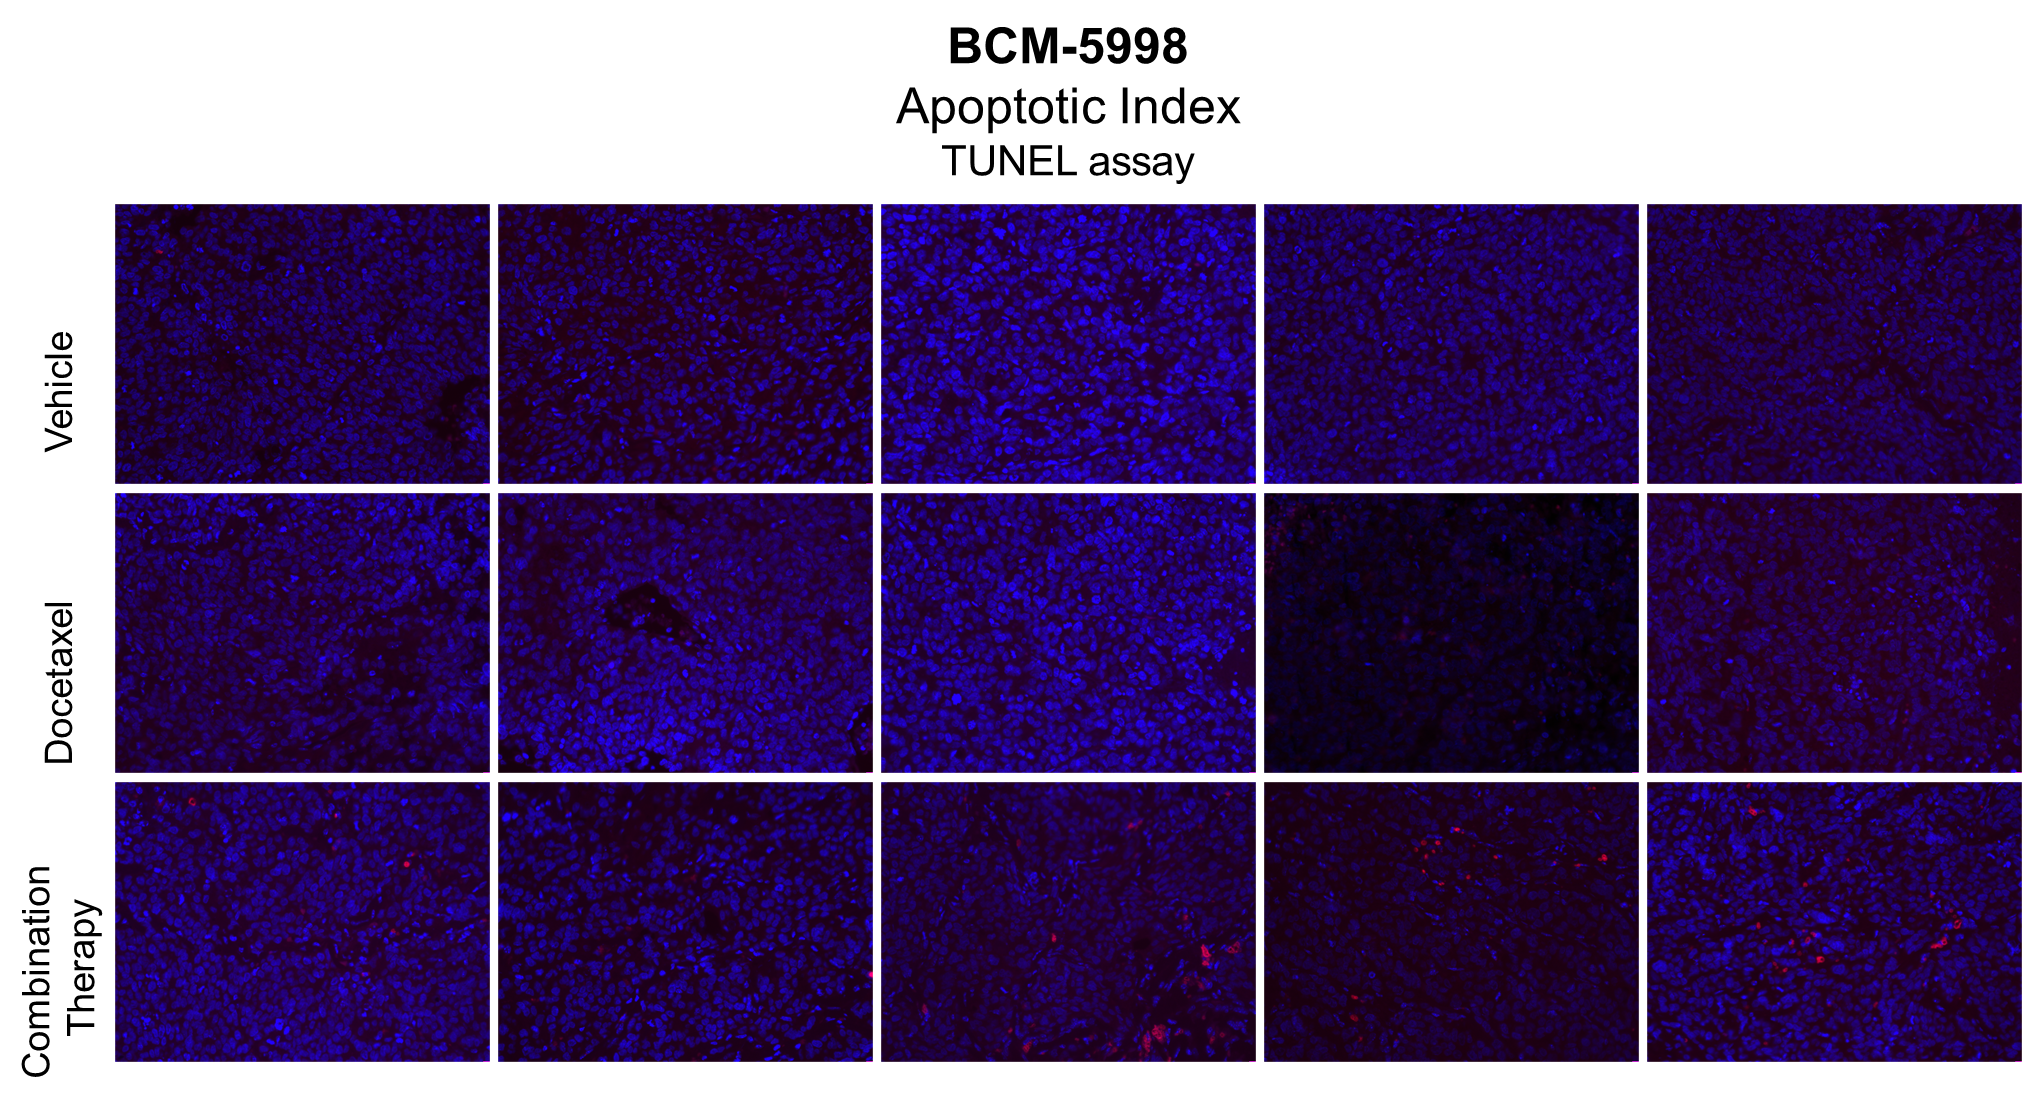


**F**

**G**
